# Supplementary material for: AhR diminishes the efficacy of chemotherapy via suppressing STING dependent type-I interferon in bladder cancer
Source: PubMed Central journal article supplement (PMC10480448; doi:10.1038/s41467-023-41218-5), 2023-09-05
Supplement: 41467_2023_41218_MOESM1_ESM.pdf [file 41467_2023_41218_MOESM1_ESM.pdf]

**Supplementary Information**

**AhR Diminishes the Efficacy of Chemotherapy via Suppressing STING  
Dependent Type-I Interferon in Bladder Cancer**

**Ma et al.**

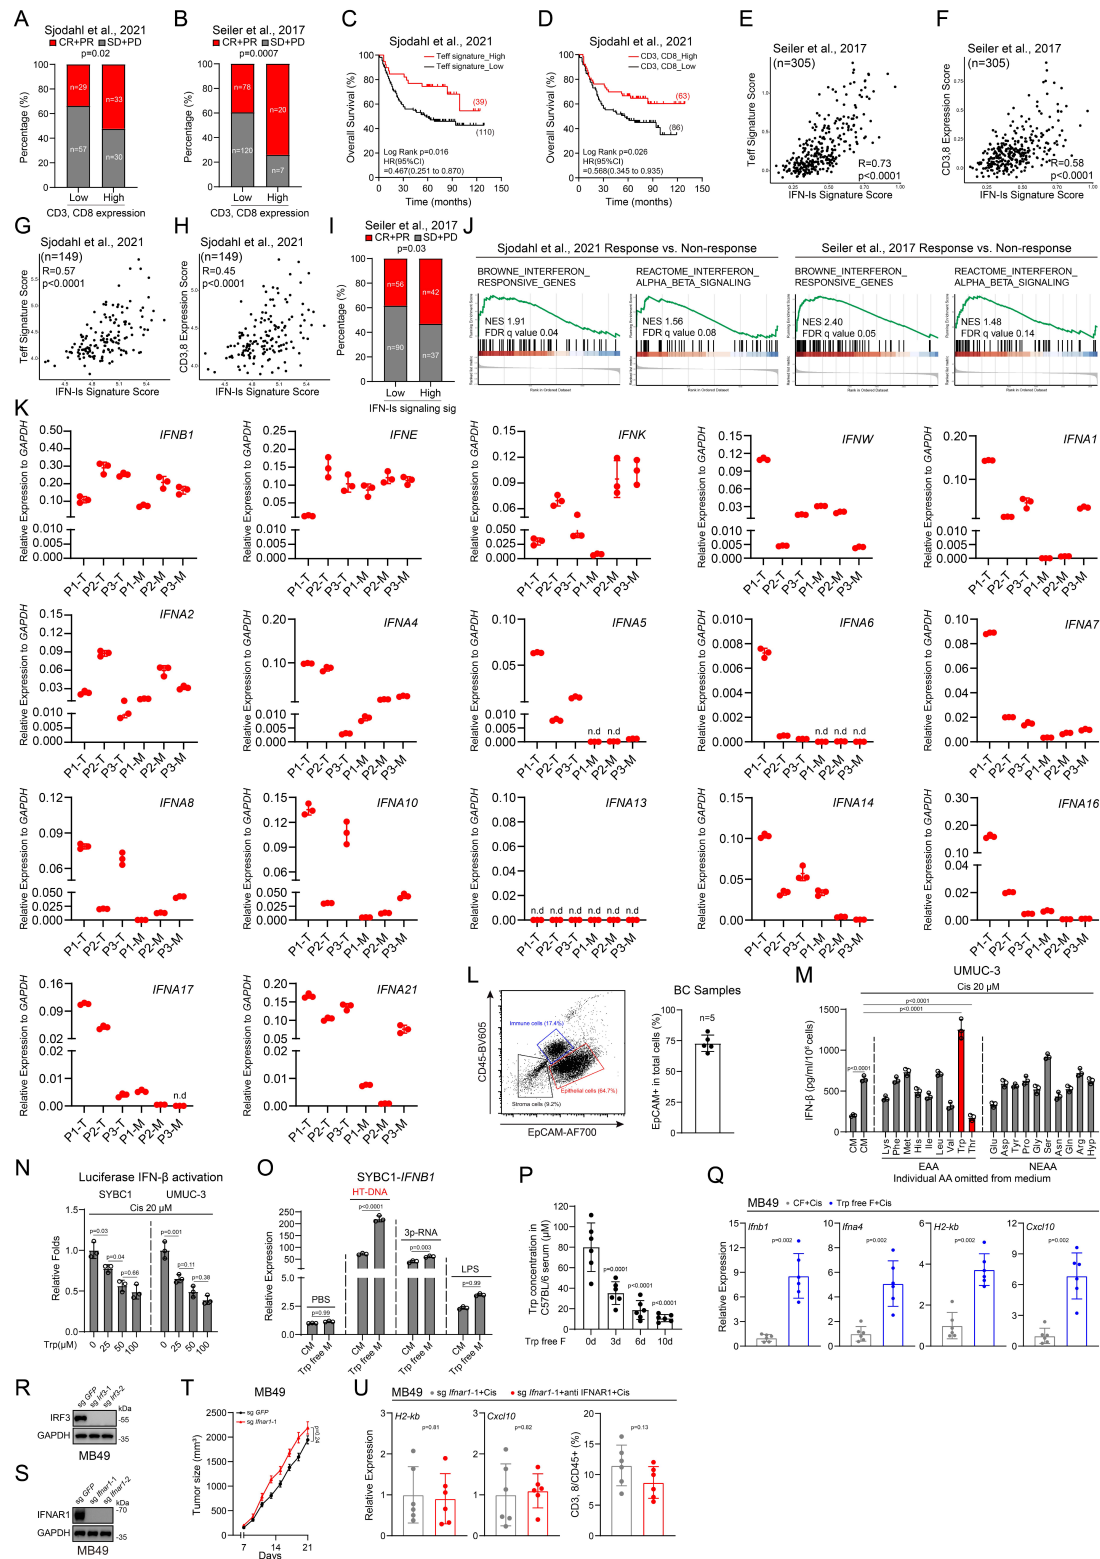

**Supplementary Fig.1** Trp diminishes IFN-I production induced by cisplatin, related to Fig. 1.

**A, B** The correlation between NAC response and CD3, CD8 expression. CR=complete response; PR=partial response; SD=stable disease; PD=progressive disease<sup>1,2</sup>. **C, D** Kaplan-Meier survival curves of patients with low and high Tef signature score or CD3, CD8 expression score<sup>1,2</sup>. **E-H** The correlation between IFN-Is signature score and Tef signature score or CD3, CD8 expression score<sup>1,2</sup>. **I** The

correlation between NAC response rate and IFN-Is signature expression<sup>2</sup>. **J** GSEA plot shows upregulation pathway genes in NAC response samples (CR+RP) compared to non-response samples (SD+PD)<sup>1, 2</sup>. **K** mRNA expression of indicated IFN-Is in paired tumor and myeloid cells isolated from treatment naïve bladder cancer samples. **L** Proportion of immune cells, stroma cells, and epithelial cells in bladder cancer samples (n=5). **M** ELISA for IFN-β content in the supernatant after individual AA omitted from medium and treated with cisplatin. **N** Luciferase reporter assays for IFN-β after Trp-free medium culture and treated with cisplatin. **O** mRNA expression of *IFNB1* after treated with HT-DNA, 3p-RNA, or LPS under Trp-free medium culture. **P** HPLC-MS detection of Trp levels in mice serum after Trp free feed (n=6). P-value compared to 0d. **Q** Effect of Trp-free feed combined with cisplatin on mRNA expression of *Ifnb1*, *Ifna4*, *H2-ka*, and *Cxcl10* in tumor (n=6). **R** Immunoassay for *Irf3* knocked-out efficiency. **S** Immunoassay for *Ifnar1* knocked-out efficiency. **T** Effect of *Ifnar1* knocked-out on MB49 growth (n=6) (Mean ± SEM). **U** Effect of *Ifnar1* knocked-out combined with anti-IFNAR1 neutralizing antibody and cisplatin on mRNA expression of *H2-ka*, and *Cxcl10* or percentage of CD8<sup>+</sup> T cells in tumor (n=6). P-value by two-tailed Pearson's chi-square test (**A, B, I**). P-value by Kaplan-Meier survival analysis (**C, D**). The correlation coefficient and two-tailed p value were calculated using Pearson's correlation analysis (**E-H**). P-value by One-way ANOVA (**M-P**). P-value by two-tailed Wilcoxon (**Q, T, U**). Area under curve (AUC) was used to determine the optimal cut-off. All p-value < 0.05 as statistic difference. Error bars represent Mean ± SD, unless otherwise indicated. Three biologically independent experiments were performed (**K, M-O, R, S**). Source data are provided as a Source Data file.

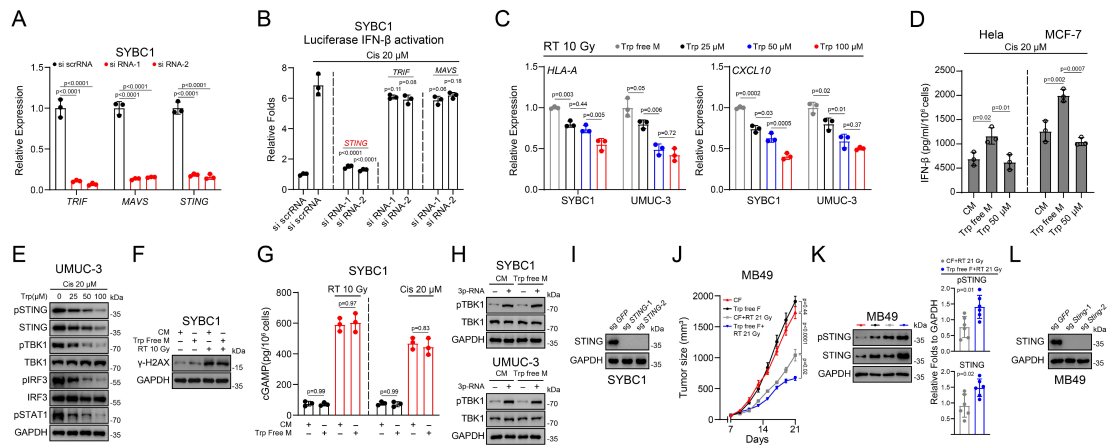

**Supplementary Fig.2** Trp suppresses IFN-I production at STING level, related to Fig.2.

**A** mRNA expression for indicated genes knocked-down efficiency. **B** Luciferase reporter assays for IFN- $\beta$  after knocked-down indicated genes and treated with cisplatin. P-value compared to si-scrRNA group. **C** mRNA expression of *HLA-A* and *CXCL10* after Trp-free medium culture or Trp supplementation and treated with RT. **D** ELISA for IFN- $\beta$  content in the supernatant after Trp-free medium culture or Trp supplementation and treated with cisplatin. **E** Immunoassay for representative cGAS-STING related genes expression after Trp supplementation and treated with cisplatin. **F** Immunoassay for H2A.X expression after cultured in CM or Trp-free medium and treated with RT. **G** ELISA for cGAMP content cultured in CM or Trp-free medium and treated with cisplatin or RT. **H** Immunoassay for pTBK1/TBK1 expression after cultured in CM or Trp-free medium and treated with 3p-RNA. **I** Immunoassay for *STING* knocked-out efficiency. **J** Effect of Trp-free feed combined RT on MB49 growth (n=6) (Mean  $\pm$  SEM). **K** Immunoassay of pSTING and STING expression in MB49 bearing mice after indicated treatment (n=6). **L** Immunoassay for *Sting* knocked-out efficiency. P-value by One-way ANOVA (**A-D**, **G**, **J**). P-value by two-tailed Wilcoxon (**K**). All p-value < 0.05 as statistic difference. Error bars represent Mean  $\pm$  SD, unless otherwise indicated. Three biologically independent experiments were performed (**A-I**, **L**). Source data are provided as a Source Data file.

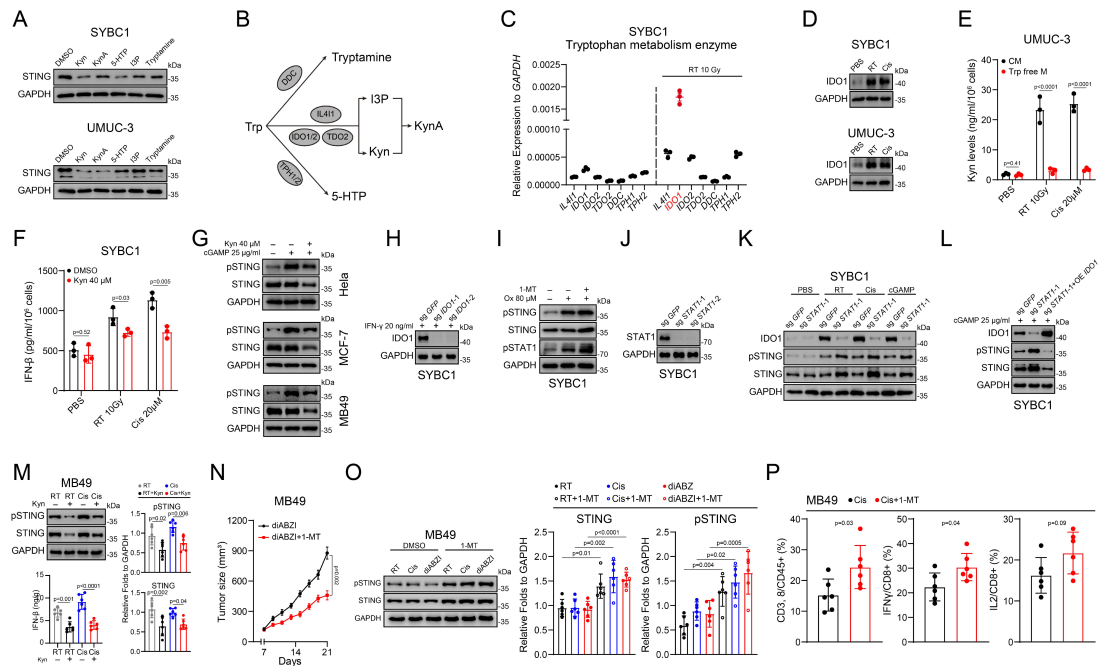

**Supplementary Fig.3** Indoleamine 2,3-dioxygenase 1 (IDO1)-mediated Trp decreased STING level and IFN-I production, related to Fig.3.

**A** Immunoassay for STING expression after treated with indicated endogenous Trp-derived metabolites. **B** Diagram shows Trp metabolites and corresponding metabolic enzymes. **C** mRNA expression of Trp catabolic enzymes after treated with RT. **D** Immunoassay for IDO1 expression after treated with cisplatin or RT. **E** HPLC-MS detection of Kyn levels after treated with cisplatin or RT under indicated medium. **F** ELISA for IFN- $\beta$  content in the supernatant after treated with cisplatin or RT combined with Kyn. **G** Immunoassay for pSTING/STING expression after treated with cGAMP or cGAMP combined Kyn. **H** Immunoassay for *IDO1* knocked-out efficiency. **I** Immunoassay for representative cGAS-STING related genes expression after treated with oxaliplatin combined with 1-MT. **J** Immunoassay for *STAT1* knocked-out efficiency. **K** Immunoassay for IDO1, pSTING, and STING expression of *STAT1* knocked-out cells after indicated treatment. **L** Immunoassay for IDO1, pSTING, and STING expression of *STAT1* knocked-out cells or *STAT1* knocked-out with overexpress *IDO1* cells after treated with cGAMP. **M** Immunoassay for pSTING and STING expression and IFN- $\beta$  content in MB49 bearing mice after indicated treatment (n=6). **N** Effect of diABZI combined with 1-MT on MB49 growth (n=6) (Mean  $\pm$  SEM). **O** Immunoassay of pSTING and STING expression in MB49 bearing mice after 1-MT combined indicated treatment (n=6). **P** Percentage of CD8 $^{+}$  T cells, IFN $\gamma^{+}$ CD8 $^{+}$  T cells, and IL2 $^{+}$ CD8 $^{+}$  T cells in MB49 bearing mice after treated with cisplatin combined with 1-MT (n=6). P-value by two-tailed t-test (**E**, **F**). P-value by two-tailed Wilcoxon (**N**, **P**). P-value by One-way ANOVA (**M**, **O**). All p-value < 0.05 as statistic difference. Error bars represent Mean  $\pm$  SD, unless otherwise indicated. Three biologically independent experiments were performed (**A**, **C**-**L**). Source data are provided as a Source Data file.

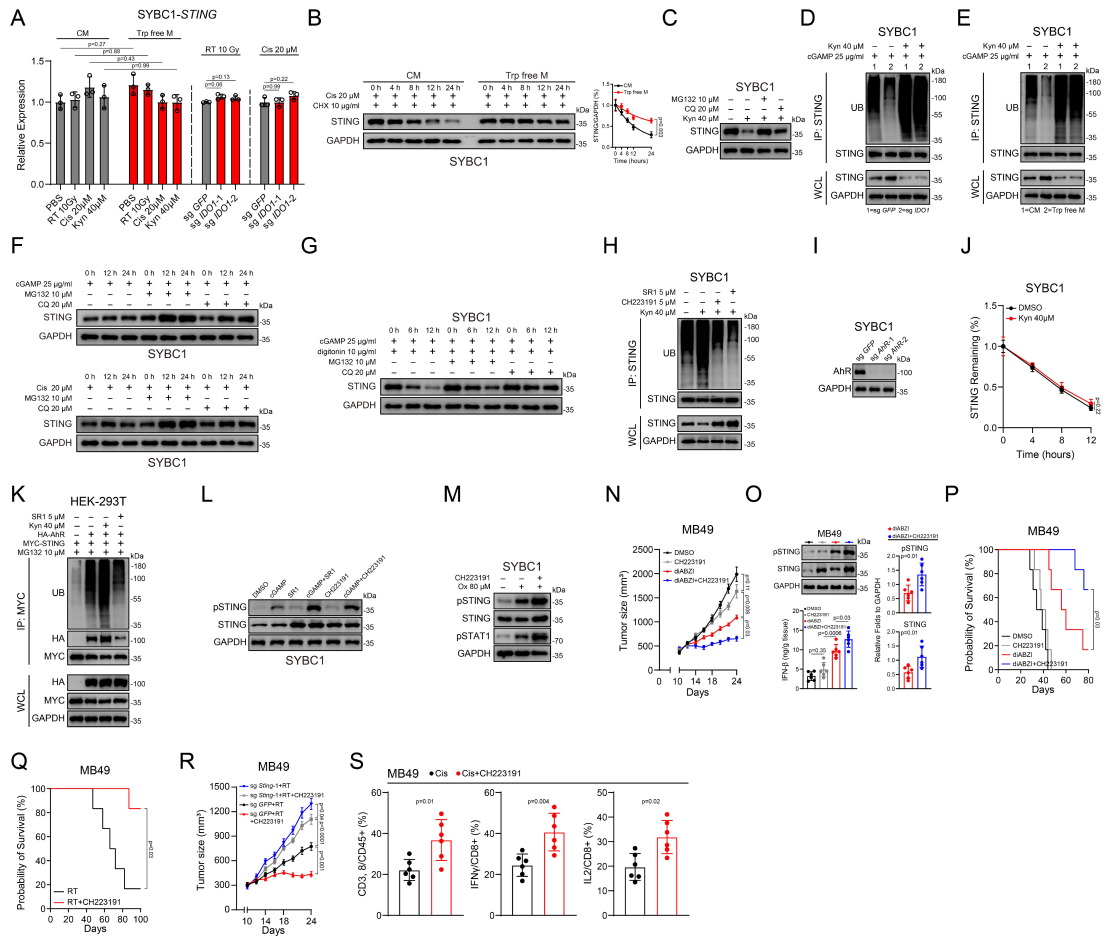

**Supplementary Fig.4** Trp-IDO1-Kyn metabolic pathway regulated STING stability through AhR in a ubiquitin-proteasome-dependent manner, related to Fig.4.

**A** mRNA expression of *STING* after indicated treatment and medium. **B** Immunoassay for STING expression after Trp-free medium cultured and treated with cisplatin in different time points. **C** Immunoassay for STING expression after treated with Kyn combined with CQ or MG132. **D** Coimmunoprecipitation and immunoassay for extracts of cell lysate of *IDO1* knocked-out cells by anti-STING antibodies after treated with Kyn and cGAMP. **E** Coimmunoprecipitation and immunoassay for extracts of cell lysate after cultured with complete medium or Trp-free medium by anti-STING antibodies after treated with Kyn and cGAMP. **F** Immunoassay for STING expression after indicated treatment. **G** Immunoassay for STING expression after indicated treatment combined with digitonin. **H** Coimmunoprecipitation and immunoassay for extracts of cell lysate by anti-STING antibodies after treated with Kyn combined SR1 or CH223191. **I** Immunoassay for *AhR* knocked-out efficiency. **J** mRNA expression of *STING* remaining after treated with actinomycin (10μM). **K** Coimmunoprecipitation and immunoassay for extracts of HEK293T cells under indicated treatment and transfected with HA-AhR, MYC-STING by anti-MYC beads. **L** Immunoassay for pSTING and STING expression after treated with SR1 and CH223191 combined with cGAMP. **M** Immunoassay for representative cGAS-STING related genes expression after treated with oxaliplatin combined with CH223191. **N-O** Effect of CH223191 combined with diABZI on MB49 growth (n=6) (Mean ± SEM) (N), pSTING and STING expression and IFN-β production (O) in tumor. **P** Kaplan-Meier survival curves of MB49 bearing mice after treated with CH223191 combined with diABZI (n=6). **Q** Kaplan-Meier survival curves of MB49 bearing mice after treated with CH223191 combined with RT (n=6). **R** Effect of RT combined with CH223191 on MB49 growth

(n=6) (Mean  $\pm$  SEM). **S** Percentage of CD8<sup>+</sup> T cells, IFN $\gamma$ <sup>+</sup>CD8<sup>+</sup> T cells, and IL2<sup>+</sup>CD8<sup>+</sup> T cells in MB49 bearing mice after treated with cisplatin combined with CH223191 (n=6). P-value by One-way ANOVA (**A**, **N**, **O**, **R**). P-value by two-tailed t-test (**B**, **J**). P-value by two-tailed Wilcoxon (**O**, **S**). P-value by Kaplan-Meier survival analysis (**P**, **Q**). All p-value < 0.05 as statistic difference. Error bars represent Mean  $\pm$  SD, unless otherwise indicated. Three biologically independent experiments were performed (**A-M**). Source data are provided as a Source Data file.

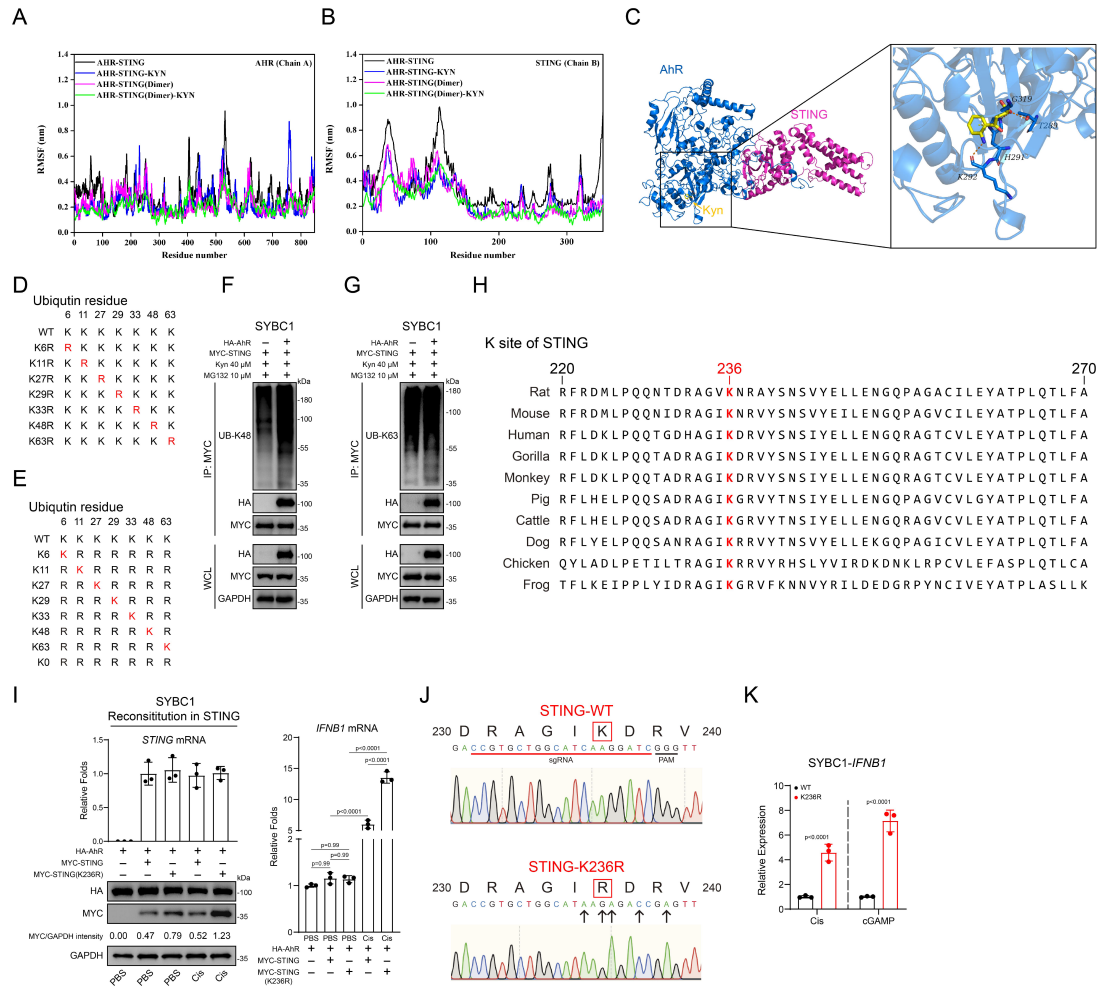

**Supplementary Fig.5** STING was ubiquitinated on lysine 236 with K48 linkage by AhR, related to Fig.5.

**A, B** RMSF plot for AhR-STING, AhR-STING-KYN, AhR-STING (dimer), and AhR-STING-KYN (dimer) of the simulation. **C** The interaction between KYN and AhR for AhR-STING-KYN in the simulation. AhR is colored with marine, STING with magenta, KYN with yellow. The key residues in AhR are shown as marine stick. The orange dashes represent hydrogen bond interaction. The yellow dashes represent  $\pi$ - $\pi$  conjugation interaction. **D, E** Schematic presentation of UB and its mutants. K0 denotes UB with all lysine residues mutated to arginine. **F, G** Coimmunoprecipitation and immunoblotting for extracts of cells lysate after treated with Kyn and transfected with HA-AhR (WT) and MYC-STING (WT) by anti-MYC beads. **H** Alignment of STING amino acid sequences. Highlighted amino acids indicate conserved lysine (K) of STING. **I** Immunoblotting and mRNA expression for *STING* and *IFNB1* after transfected with HA-AhR (WT), and MYC-STING (WT), *STING* (K236R) and treated with cisplatin. P-value < 0.05 as statistic difference by One-way ANOVA (Mean  $\pm$  SD). **J** Sequencing of parental and individual clones of parental SYBC1 cells with knock-in expression of *STING* (K236R) mutants. Black arrows indicate mutated nucleotides. A mutated amino acid and its wild-type counterpart are indicated by the solid red box. **K** mRNA expression of *IFNB1* in K236R cells after treated with cisplatin or cGAMP (Mean  $\pm$  SD). P-value < 0.05 as statistic difference by two-tailed t-test. Three biologically independent experiments were performed (**F, G, I-K**). Source data are provided as a Source Data file.



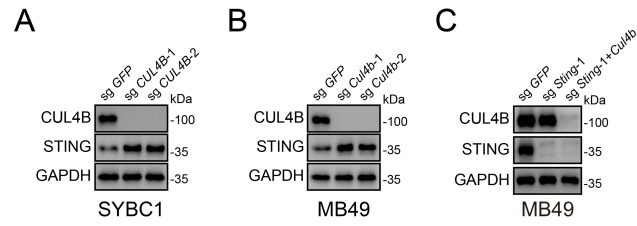

**Supplementary Fig.6** AhR worked as an adaptor to facilitate STING ubiquitination through CUL4B-RBX1 E3 complex, related to Fig.6.

**A-C** Immunoassay for *CUL4B* (A), *Cul4b* (B) and *Sting/Cul4b* (C) knocked-out efficiency. Three biologically independent experiments were performed (**A-C**). Source data are provided as a Source Data file.

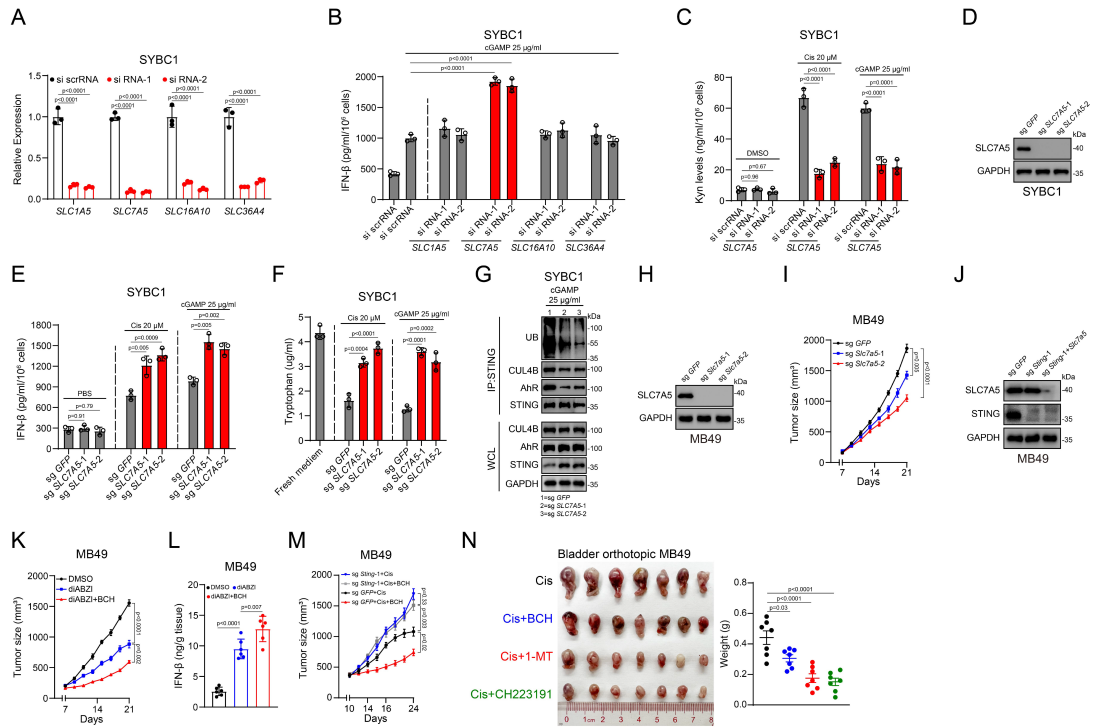

**Supplementary Fig.7** SLC7A5 acted as critical Trp transporter to regulate STING stability, related to Fig.7.

**A** mRNA expression for indicated genes knocked-down efficiency. **B** ELISA for IFN- $\beta$  content in the supernatant after knocked-down indicated transporters and treated with cGAMP. **C** HPLC-MS detection of Kyn after knocked-down indicated genes and treated with cGAMP or cisplatin. **D** Immunoassay for SLC7A5 knocked-out efficiency. **E** ELISA for IFN- $\beta$  content in the supernatant after knocked-out SLC7A5 and treated with cGAMP or cisplatin. **F** HPLC-MS detection of Trp remaining in the supernatant after knocked-out SLC7A5 and treated with cGAMP or cisplatin. **G** Coimmunoprecipitation and immunoassay for extracts of cell lysate in SLC7A5 knocked-out cells and treated with cGAMP by anti-STING antibodies. **H** Immunoassay for *Slc7a5* knocked-out efficiency. **I** Effect of *Slc7a5* knocked-out on MB49 growth (n=6) (Mean  $\pm$  SEM). **J** Immunoassay for *Sting/Slc7a5* knocked-out efficiency. **K, L** Effect of diABZI and BCH on MB49 growth (n=6) (Mean  $\pm$  SEM) (K) and IFN- $\beta$  production (L) in tumor. **M** Effect of cisplatin combined with BCH on MB49 growth (n=6) (Mean  $\pm$  SEM). **N** Effect of BCH, 1-MT, and CH223191 combined with cisplatin on orthotopic MB49 growth (n=7) (Mean  $\pm$  SEM). P-value by One-way ANOVA (**A-C, E, F, I, K-N**). All p-value < 0.05 as statistic difference. Error bars represent Mean  $\pm$  SD, unless otherwise indicated. Three biologically independent experiments were performed (**A-H, J**). Source data are provided as a Source Data file.

**Supplementary Table 1.** The binding free energy (in kcal/mol) and its components obtained from the MM/PBSA calculation for AhR-STING, AhR-STING-KYN, AhR-STING (Dimer), and AhR-STING-KYN (Dimer).

| Contribution                 | AhR-STING | AhR-STING-KYN | AhR-STING (Dimer) | AhR-STING-KYN (Dimer) |
|------------------------------|-----------|---------------|-------------------|-----------------------|
| $\Delta E_{\text{vdw}}$      | -228.84   | -290.83       | -245.07           | -337.58               |
| $\Delta E_{\text{ele}}$      | -521.89   | -469.01       | -504.57           | -446.10               |
| $\Delta G_{\text{polar}}$    | 653.51    | 626.61        | 641.32            | 609.93                |
| $\Delta G_{\text{nonpolar}}$ | -30.15    | -38.19        | -33.80            | -40.92                |
| $\Delta G_{\text{total}}$    | -127.36   | -171.43       | -142.13           | -214.66               |

**Supplementary Table 2.** The contact list between AhR with STING for AhR-STING.

| Chain A | Residue        | Chain B | Residue        | Interaction type           |
|---------|----------------|---------|----------------|----------------------------|
| AhR     | Tyr371.O       | STING   | Gln227.NE2     | Hydrogen bond              |
| AhR     | Asn373.ND2     | STING   | Thr229.OG1     | Hydrogen bond              |
| AhR     | Asn373.ND2     | STING   | Asp237.O       | Hydrogen bond              |
| AhR     | Gly374.N       | STING   | Gln227.OE1     | Hydrogen bond              |
| AhR     | His625.ND1     | STING   | Asn188.ND2     | Hydrogen bond              |
| AhR     | His626.O       | STING   | Arg191.NH1     | Hydrogen bond              |
| AhR     | Lys628.NZ      | STING   | Glu249.OE1     | Hydrogen bond, Salt bridge |
| AhR     | Lys628.N       | STING   | Arg253.O       | Hydrogen                   |
| AhR     | Glu633.OE1/OE2 | STING   | Arg191.NH1/NH2 | Hydrogen bond, Salt bridge |
| AhR     | Glu633.OE1     | STING   | Arg253.NH1     | Salt bridge                |
| AhR     | Gln640.OE1     | STING   | Asn187.N       | Hydrogen bond              |
| AhR     | Gly649.O       | STING   | Gln227.NE2     | Hydrogen bond              |
| AhR     | Met650.SD      | STING   | Gln227.NE2     | Hydrogen bond              |
| AhR     | Gln658.OE1     | STING   | Lys224.NZ      | Hydrogen bond              |
| AhR     | Leu815.N       | STING   | Asp210.O       | Hydrogen bond              |
| AhR     | Asn816.O       | STING   | Gln266.NE2     | Hydrogen bond              |
| AhR     | Asn817.ND2     | STING   | Thr263.OG1     | Hydrogen bond              |
| AhR     | Asn817.ND2     | STING   | Gln266.OE1     | Hydrogen bond              |
| AhR     | Asn820.O       | STING   | His232.NE2     | Hydrogen bond              |
| AhR     | Leu827.O       | STING   | Arg94.NH1      | Hydrogen bond              |
| AhR     | Pro829.CA      | STING   | Cys91.SG       | Hydrogen bond              |
| AhR     | His831.N       | STING   | Arg86.O        | Hydrogen bond              |
| AhR     | Glu835.OE1     | STING   | Arg76.NH1/NH2  | Hydrogen bond, Salt bridge |
| AhR     | Glu835.OE1     | STING   | Lys150.NZ      | Hydrogen bond, Salt bridge |

**Supplementary Table 3.** The contact list between AhR with STING for AhR-STING-KYN.

| Chain A | Residue        | Chain B | Residue     | Interaction type           |
|---------|----------------|---------|-------------|----------------------------|
| AhR     | Gln627.OE1     | STING   | Arg253. NH1 | Hydrogen bond              |
| AhR     | Gln629.OE1     | STING   | Arg253.N    | Hydrogen bond              |
| AhR     | Gln637.NE2     | STING   | Asp223.OD2  | Hydrogen bond              |
| AhR     | Lys643.NZ      | STING   | Asp223.OD1  | Hydrogen bond, Salt bridge |
| AhR     | Asn648.OD1     | STING   | Tyr186.OH   | Hydrogen bond              |
| AhR     | Asn653.ND2     | STING   | Gln227.OE1  | Hydrogen bond              |
| AhR     | Asn804.ND2     | STING   | Met214.SD   | Hydrogen bond              |
| AhR     | Asn808.ND2     | STING   | Asp210.OD1  | Hydrogen bond              |
| AhR     | Asn808.OD1     | STING   | Asn211.ND2  | Hydrogen bond              |
| AhR     | Tyr811.O       | STING   | Asn211.ND2  | Hydrogen bond              |
| AhR     | Glu814.N       | STING   | Asp210.O    | Hydrogen bond              |
| AhR     | Glu814.OE1/OE2 | STING   | Lys224.NZ   | Hydrogen bond, Salt bridge |
| AhR     | Leu815.N       | STING   | Asp210.O    | Hydrogen bond              |
| AhR     | Asn816.ND2     | STING   | Pro209.O    | Hydrogen bond              |
| AhR     | Asn816.O       | STING   | Thr263.OG1  | Hydrogen bond              |
| AhR     | Leu827.O       | STING   | Ser162.OG   | Hydrogen bond              |
| AhR     | Arg837.NH2     | STING   | Asp301.OD1  | Hydrogen bond, Salt bridge |
| AhR     | Pro838.O       | STING   | Arg14.NH1   | Hydrogen bond              |
| AhR     | Ser845.OG      | STING   | Arg14.NE    | Hydrogen bond              |

**Supplementary Table 4.** The contact list between AhR with STING for AhR-STING (Dimer).

| Chain A | Residue        | Chain B | Residue        | Interaction type           |
|---------|----------------|---------|----------------|----------------------------|
| AhR     | Tyr371.O       | STING   | Gln227.NE2     | Hydrogen bond              |
| AhR     | Asn373.ND2     | STING   | Thr229.OG1     | Hydrogen bond              |
| AhR     | Asn373.ND2     | STING   | Asp237.O       | Hydrogen bond              |
| AhR     | Asn373.N       | STING   | Gln227.OE1     | Hydrogen bond              |
| AhR     | Arg375.NH1/NH2 | STING   | Asn237.OD1/OD2 | Hydrogen bond, Salt bridge |
| AhR     | Ala606.O       | STING   | Arg191.NE      | Hydrogen bond              |
| AhR     | His626.O       | STING   | Arg191.NH1     | Hydrogen bond              |
| AhR     | Lys628.NZ      | STING   | Glu249.OE1/OE2 | Hydrogen bond, Salt bridge |
| AhR     | Gln629.OE1     | STING   | Arg191.NH1     | Hydrogen bond              |
| AhR     | Glu633.OE1/OE2 | STING   | Arg191.N       | Hydrogen bond              |
| AhR     | Glu633.OE1     | STING   | Arg253.NH1     | Salt bridge                |
| AhR     | Glu633.O       | STING   | Arg253.NH1     | Hydrogen bond              |
| AhR     | Gln640.NE2     | STING   | Leu189.O       | Hydrogen bond              |
| AhR     | Gly649.O       | STING   | Gln227.NE2     | Hydrogen bond              |
| AhR     | Asn655.OD1     | STING   | Lys224.NZ      | Hydrogen bond              |
| AhR     | Gln658.OE1     | STING   | Lys224.NZ      | Hydrogen bond              |
| AhR     | Pro812.O       | STING   | Asn211.ND2     | Hydrogen bond              |
| AhR     | Asn816.ND2     | STING   | Asp210.O       | Hydrogen bond              |
| AhR     | Asn816.O       | STING   | Gln266.NE2     | Hydrogen bond              |
| AhR     | Asn817.OD1     | STING   | Thr263.OG1     | Hydrogen bond              |
| AhR     | Asn817.ND2     | STING   | Thr263.OG1     | Hydrogen bond              |
| AhR     | Asn817.ND2     | STING   | Gln266.OE1     | Hydrogen bond              |
| AhR     | Thr821.OG1     | STING   | Gln266.OE1     | Hydrogen bond              |
| AhR     | Pro833.O       | STING   | Gln276.NE2     | Hydrogen bond              |
| AhR     | Ala836.O       | STING   | Gln276.NE2     | Hydrogen bond              |
| AhR     | Arg837.NE      | STING   | Gln273.O       | Hydrogen bond              |

**Supplementary Table 5.** The contact list between AhR with STING for AhR-STING-KYN (Dimer).

| Chain A | Residue        | Chain B | Residue     | Interaction type           |
|---------|----------------|---------|-------------|----------------------------|
| AhR     | Gln624.O       | STING   | Arg191.NH1  | Hydrogen bond              |
| AhR     | Hie625.ND1     | STING   | Gly192.N    | Hydrogen bond              |
| AhR     | Gln627.OE1     | STING   | Arg253. NH1 | Hydrogen bond              |
| AhR     | Gln629.OE1     | STING   | Arg253.N    | Hydrogen bond              |
| AhR     | Gln629.NE2     | STING   | Arg253.O    | Hydrogen bond              |
| AhR     | Gln637.NE2     | STING   | Asp223.OD2  | Hydrogen bond              |
| AhR     | Lys643.NZ      | STING   | Asp223.OD1  | Hydrogen bond, Salt bridge |
| AhR     | Asn648.O       | STING   | Gln227.NE2  | Hydrogen bond              |
| AhR     | Asn653.ND2     | STING   | Gln227.OE1  | Hydrogen bond              |
| AhR     | Lys801.NZ      | STING   | Gly207.O    | Hydrogen bond              |
| AhR     | Asn804.ND2     | STING   | Met214.O    | Hydrogen bond              |
| AhR     | Asn808.ND2     | STING   | Asp210.OD2  | Hydrogen bond              |
| AhR     | Asn808.OD1     | STING   | Asn211.ND2  | Hydrogen bond              |
| AhR     | Tyr811.O       | STING   | Asn211.ND2  | Hydrogen bond              |
| AhR     | Glu814.N       | STING   | Asp210.O    | Hydrogen bond              |
| AhR     | Glu814.OE1/OE2 | STING   | Lys224.NZ   | Hydrogen bond, Salt bridge |
| AhR     | Asn816.ND2     | STING   | Pro209.O    | Hydrogen bond              |
| AhR     | Asn816.O       | STING   | Thr263.OG1  | Hydrogen bond              |
| AhR     | Arg837.NH2     | STING   | Asp301.OD1  | Hydrogen bond, Salt bridge |
| AhR     | Pro838.O       | STING   | Arg14.NH1   | Hydrogen bond              |

**Supplementary Table 6.** Used signature and pathways in this paper.

Teff signature

CD8A,CXCL10,CXCL9,GZMA,GZMB,IFNG,PRF1,TBX21

IFN-Is signaling signature

GOBP\_POSITIVE\_REGULATION\_OF\_TYPE\_I\_INTERFERON\_MEDIATED\_SIGNALING\_PATHWAY

STING signature

WP\_CYTOSOLIC\_DNASENSING\_PATHWAY

Trp metabolism signature

GOBP\_TRYPTOPHAN\_CATABOLIC\_PROCESS\_TO\_KYNURENINE

Trp transporters signature

GOBP\_TRYPTOPHAN\_TRANSPORT

AhR activation signature

CRH,ABCG2,SCIN,VAV3,CYP1B1,SORL1,PLA2G4A,ID2,FOXA1,CARD11,SOCS2,GATA3,OVOL1,NQO1,PAX5,KIAA1549,GSTM1,FOS,AQP3,TFF1,HSD17B4,TIPARP,EBF1,AhR,ESR1,FOXQ1,IKZF3,PDS5B,ACTA2,FGFR2,NFE2L2,NCOA2,BLNK,INSIG1,LTBP1,CCL5



**Supplementary Table 7.** Simulation Model Set.

| <b>Systems</b>           | <b>Box Dimensions<br/>(nm*nm*nm)</b> | <b>Number<br/>of<br/>Atoms</b> | <b>Number<br/>of<br/>Water</b> | <b>NaCl<br/>Conc.<br/>(mol/L)</b> | <b>Time<br/>(ns)</b> |
|--------------------------|--------------------------------------|--------------------------------|--------------------------------|-----------------------------------|----------------------|
| AhR-STING                | 14.9918*15.9165*9.5233               | 227419                         | 69504                          | 0.15                              | 500                  |
| AhR-STING-KYN            | 14.9793*15.9033*9.5153               | 227563                         | 69543                          | 0.15                              | 500                  |
| AhR-STING (Dimer)        | 17.2544*18.1980*12.0454              | 325645                         | 95949                          | 0.15                              | 500                  |
| AhR-STING-KYN<br>(Dimer) | 17.2319*17.7383*12.0077              | 319762                         | 93970                          | 0.15                              | 500                  |

**Supplementary Table 8.** Primer sequences for qRT-PCR, siRNA, and sgRNA assays.

| Name                                | Forward                       | Reverse                        |
|-------------------------------------|-------------------------------|--------------------------------|
| <b>Primer sequences for qRT-PCR</b> |                               |                                |
| HLA-A                               | 5'-ACCCTCGTCCTGCTACTCTC-3'    | 5'-CTGTCTCCTCGTCCCAATACT-3'    |
| CXCL10                              | 5'-GTGGCATTCAAGGAGTACCTC-3'   | 5'-TGATGGCCTTCGATTCTGGATT-3'   |
| IFNB1                               | 5'-GCTTGGATTCTACAAAGAAGCA-3'  | 5'-ATAGATGGTCAATGCGGCGTC-3'    |
| IFNA2                               | 5'-GCTTGGGATGAGACCCTCCTA-3'   | 5'-CCCACCCCCTGTATCACAC-3'      |
| IFNE                                | 5'-TCCTCAGAAGTCTTTGAGTCCTC-3' | 5'-AGGAATTTCTCCGTGTGGTTTTTC-3' |
| IFNK                                | 5'-GTGGCTTGAGATCCTTATGGGT-3'  | 5'-CAGATTTTGCCAGGTGACTCTT-3'   |
| IFNW1                               | 5'-GAAGGCCCATGTCATGTCTGT-3'   | 5'-GAGTTGGTCTAGGAGGGTCAT-3'    |
| IFNA1                               | 5'-TCAAAGACTCTCACCCCTGC-3'    | 5'-CAGTGTAAGGTGCACATGACG-3'    |
| IFNA4                               | 5'-AGAGGCCGAAGTTCAAGGTTA-3'   | 5'-ACTGGTGGCCATCAAACCTCC-3'    |
| IFNA5                               | 5'-CAAGGTTCAAGGTCACCTCAAT-3'  | 5'-CACCAGGGCCATCAGTAAAC-3'     |
| IFNA6                               | 5'-ATCTGTTGCTTGGGATGAGAGG-3'  | 5'-AGGCACAAGGGCTGTACTTTT-3'    |
| IFNA7                               | 5'-CCCACCTCAGGTAGCCTAGTGAT-3' | 5'-TCACAGCCCAGAGAGCAGAT-3'     |
| IFNA8                               | 5'-CTGTTCACTGTATGGGCAC-3'     | 5'-GCACAATCAGGGTTGGAGTTC-3'    |
| IFNA10                              | 5'-CACGACGCGTTGAATCAAAT-3'    | 5'-ACATTAACCACAATGTAAAGCGAC-3' |
| IFNA13                              | 5'-TGGTTGAGAACACGGCTCT-3'     | 5'-CATGTTGGACCAGGTGTTA-3'      |
| IFNA14                              | 5'-CATCTTCGGGATTCCCAATGGC-3'  | 5'-TTACAGCCCAGAGAGCAGCTT-3'    |
| IFNA16                              | 5'-GGATTCATCTGCTGCTTGGGATG-3' | 5'-GAGTCCTCATTTCATCAGGGCAA-3'  |
| IFNA17                              | 5'-TGCTGGTGCTCAGCTACAAA-3'    | 5'-TCCTCCTGGGGAAGTCCAAA-3'     |
| IFNA21                              | 5'-TCCACACTTCTATGACTTCTGCC-3' | 5'-TGCTGCACAGGTAACATGA-3'      |
| IFNB1 (mouse)                       | 5'-CAGCTCCAAGAAAGGACGAAC-3'   | 5'-GGCAGTGTAACCTTCTGCAT-3'     |

|                                   |                                |                              |
|-----------------------------------|--------------------------------|------------------------------|
| IFNA4 (mouse)                     | 5'-TGATGAGCTACTACTGGTCAGC-3'   | 5'-GATCTCTTAGCACAAGGATGGC-3' |
| IFNA2 (mouse)                     | 5'-TACTCAGCAGACCTTGAACCT-3'    | 5'-CAGTCTTGGCAGCAAGTTGAC-3'  |
| H2-Kb (mouse)                     | 5'-CGTTCCAGGGGATGTACGG-3'      | 5'-GCTCCCACTTGTGTTTGGTGA-3'  |
| CXCL10 (mouse)                    | 5'-CCAAGTGCTGCCGTCATTTTC-3'    | 5'-GGCTCGCAGGGATGATTTCAA-3'  |
| TRIF                              | 5'-CCTGGAATCATCATCGGAACAG-3'   | 5'-TGAGTGGTCTATGGCGTCCT-3'   |
| MAVS                              | 5'-CAGGCCGAGCCTATCATCTG-3'     | 5'-GGGCTTTGAGCTAGTTGGCA-3'   |
| STING                             | 5'-CACTTGGATGCTTGCCCTC-3'      | 5'-GCCACGTTGAAATTCCTTTTT-3'  |
| IL4I1                             | 5'-ACTCGCCCGAAGACATCTAC-3'     | 5'-CATCCTCGGACATCACGTCTC-3'  |
| IDO1                              | 5'-TCTCATTTCTGTGATGGAGACTGC-3' | 5'-GTGTCCCGTTCTTGCAATTTGC-3' |
| IDO2                              | 5'-TTCAAGCTCATGTGGACAAGATG-3'  | 5'-GAGACTTCGACAAATGGAAGGG-3' |
| TDO2                              | 5'-TCCTCAGGCTATCACTACCTGC-3'   | 5'-ATCTTCGGTATCCAGTGTCCGG-3' |
| DDC                               | 5'-TGGGGACCACAACATGCTG-3'      | 5'-TCAGGGCAGATGAATGCACTG-3'  |
| TPH1                              | 5'-TAAGACCTGGGGAACCGTATT-3'    | 5'-TGGAAAAACCTGTACGCTCTTT-3' |
| TPH2                              | 5'-CTGCCTCCGAGAAGCAAGAAG-3'    | 5'-GCATGGAATGGTGGCAAGAG-3'   |
| SLC1A5                            | 5'-CCGCCTTGGCAAGTACATTCT-3'    | 5'-GGCAGGATGAAACGGCTGA-3'    |
| SLC7A5                            | 5'-CCGTGAACTGCTACAGCGT-3'      | 5'-CTTCCCGATCTGGACGAAGC-3'   |
| SLC16A10                          | 5'-ATGCTGGAAACCTTCGGCTC-3'     | 5'-TGAAGACGCTGACTATTGGGC-3'  |
| SLC36A4                           | 5'-CGCGAGGAGCTAGATATGGAT-3'    | 5'-TGGAAGTCCTAAAAGGCCAGT-3'  |
| <b>Primer sequences for siRNA</b> |                                |                              |
| TRIF-1                            | 5'-GCCAGGACAAGCUCUUGUATT-3'    | 5'-UACAAGAGCUUGUCCUGGCTT-3'  |
| TRIF-2                            | 5'-GGAUCUCUCUAGAGGCAUUTT-3'    | 5'-AAUGCCUCUAGAGAGAUCCTT-3'  |
| MAVS-1                            | 5'- CUGCCGCAAUUUCAGCAAUTT-3'   | 5'- AUUGCUGAAAUUGCGGCAGTT-3' |
| MAVS-2                            | 5'- GCUGUGAGCUAGUUGAUCUTT-3'   | 5'- AGAUCAACUAGCUCACAGCTT-3' |
| STING-1                           | 5'- GCCCUUACAUUGGAUUCUUTT-3'   | 5'- AAGCAUCCAAGUGAAGGGCTT-3' |
| STING-2                           | 5'- CCGGAUUCGAACUUAACAUTT-3'   | 5'- AUUGUAAGUUCGAAUCCGGTT-3' |

|                                   |                                 |                                  |
|-----------------------------------|---------------------------------|----------------------------------|
| Cullin 4B-1                       | 5'-GCCACGUACCGAUACAGAATT-3'     | 5'-UUCUGUAUCGGUACGUGGCTT-3'      |
| Cullin 4B-2                       | 5'-GGAGUUAUUUAGGGCUCAUTT-3'     | 5'-AUGAGCCCUAAAUAACUCCTT-3'      |
| RBX1-1                            | 5'-CUGGGAUUAUUGUGGUUGAUTT-3'    | 5'-AUCAACCACAAUAUCCCAGTT-3'      |
| RBX1-2                            | 5'-GCAGGAACCACAUUAUGGATT-3'     | 5'-UCCAUAUUGUGGUUCCUGCTT-3'      |
| SLC1A5-1                          | 5'-GCCUUGGCAAGUACAUCUUTT-3'     | 5'-AGAAUGUACUUGCCAAGGCT-3'       |
| SLC1A5-2                          | 5'-GUCGACCAUAUCUCCUUGATT-3'     | 5'-UCAAGGAGAUUUGGUCGACTT-3'      |
| SLC7A5-1                          | 5'-GGAAGGGUGAUGUGUCCAATT-3'     | 5'-UUGGACACAUCACCCUUCCTT-3'      |
| SLC7A5-2                          | 5'-GCAUUAUACAGCGGCCUCUTT-3'     | 5'-AGAGGCCGCUGUAUAAUGCTT-3'      |
| SLC16A10-1                        | 5'-GCGUCUUCACAGACCUAUUTT-3'     | 5'-AAUAGGUCUGUGAAGACGCTT-3'      |
| SLC16A10-2                        | 5'-GCAGCAGUGUCUUCACAAUTT-3'     | 5'-AUUGUGAAGACACUGCUGCTT-3'      |
| SLC36A4-1                         | 5'-CCUGGGAUCACAUCAAAUTT-3'      | 5'-AUUUGGAUGUGAUCCCAGGTT-3'      |
| SLC36A4-2                         | 5'-GGGAUUGUUACAACUUUGUTT-3'     | 5'-ACAAAGUUGUAACAAUCCCTT--3'     |
| <b>Primer sequences for sgRNA</b> |                                 |                                  |
| IRF3 (mouse)-1                    | 5'-CACCGTCCAGCTGTGACACCAGCCA-3' | 5'-AAACTGGCTGGTGTACAGCTGGAC-3'   |
| IRF3 (mouse)-2                    | 5'-CACCGGCTGGAAGGCGTGGCCTGGC-3' | 5'-AAACGCCAGGCCACGCCTTCCAGCC-3'  |
| STING (mouse)-1                   | 5'-CACCGCCAGCCATCCCACGGCCAG-3'  | 5'-AAACCTGGGCCGTGGGATGGCTGGC-3'  |
| STING (mouse)-2                   | 5'-CACCGTGTAGCCCTCATCTTTCTGG-3' | 5'-AAACCCAGAAAGATGAGGGCTACAC-3'  |
| IFNAR1 (mouse)-1                  | 5'-CACCGACCCTAAAGTGGAGCAGCCA-3' | 5'-AAACTGGCTGCTCCACTTTAGGGT-3'   |
| IFNAR1 (mouse)-2                  | 5'-CACCGCGCCCCGGCCACCAGCACCA-3' | 5'-AAACTGGTGTGGTGGCCGGGGCG-3'    |
| STING-1                           | 5'-CACCGCCATCCATCCCGTGTCCCAG-3' | 5'-AAACCTGGGACACGGGATGGATGGC-3'  |
| STING-2                           | 5'-CACCGCCTGCCTGGTGACCCTTTGG-3' | 5'-AAACCCAAAGGGTCAACCAGGCAGGC-3' |
| IDO1-1                            | 5'-CACCGGATTTTTATAATGACTGGAT-3' | 5'-AAACATCCAGTCATTATAAAAATCC-3'  |
| IDO1-2                            | 5'-CACCGCTGCCTGATCTCATAGAGTC-3' | 5'-AAACGACTCTATGAGATCAGGCAGC-3'  |
| STAT1-1                           | 5'-CACCGTCAGACAGTACCTGGCACAG-3' | 5'-AAACCTGTGCCAGGTACTGTCTGAC-3'  |
| STAT1-2                           | 5'-CACCGTTATGATGACAGTTTTCCCA-3' | 5'-AAACTGGGAAAAGTGCATCATAAC-3'   |

|                                            |                                                                                                                                                                                                 |                                 |
|--------------------------------------------|-------------------------------------------------------------------------------------------------------------------------------------------------------------------------------------------------|---------------------------------|
| AhR-1                                      | 5'-CACCGTCAAGTCAAATCCTTCCAAG-3'                                                                                                                                                                 | 5'-AAACCTTGGAAGGATTTGACTTGAC-3' |
| AhR-2                                      | 5'-CACCGGGTCCAACCTCTGTATTAAGT-3'                                                                                                                                                                | 5'-AAACACTTAATACAGAGTTGGACCC-3' |
| Cullin 4B (mouse)-1                        | 5'-CACCGCCTTCGGCGCTCTTGATTGG-3'                                                                                                                                                                 | 5'-AAACCCAATCAAGAGCGCCGAAGGC-3' |
| Cullin 4B (mouse)-2                        | 5'-CACCGAAAGAGGTGGATAGGGAGGG-3'                                                                                                                                                                 | 5'-AAACCCCTCCCTATCCACCTCTTTC-3' |
| Cullin 4B-1                                | 5'-CACCGAGCAGCAGCTGAGGGACTGG-3'                                                                                                                                                                 | 5'-AAACCCAGTCCCTCAGCTGCTGCTC-3' |
| Cullin 4B-2                                | 5'-CACCGGAGGTCAGATCTGCCACTGA-3'                                                                                                                                                                 | 5'-AAACTCAGTGGCAGATCTGACCTCC-3' |
| SLC7A5 (mouse)-1                           | 5'-CACCGGGGTCACGCCTTCGCCCTCG-3'                                                                                                                                                                 | 5'-AAACCGAGGGCGAAGGCGTGACCCC-3' |
| SLC7A5 (mouse)-2                           | 5'-CACCGTATCACGCTGCTCAACGGTG-3'                                                                                                                                                                 | 5'-AAACCACCGTTGAGCAGCGTGATAC-3' |
| SLC7A5-1                                   | 5'-CACCGCCCGAAGCGGCGCGCGCTAG-3'                                                                                                                                                                 | 5'-AACCTAGCGCGCGCCGCTTCGGGC-3'  |
| SLC7A5-2                                   | 5'-CACCGTCTTCCTTCTCCTCGGCCGC-3'                                                                                                                                                                 | 5'-AAACGCGGCCGAGGAGAAGGAAGAC-3' |
| Primer sequences for STING1 K236R knock in |                                                                                                                                                                                                 |                                 |
| sgRNA for STING1 (K236R)                   | 5'-CCGTGCTGGCATCAAGGATC-3'                                                                                                                                                                      |                                 |
| ssODN for STING1 (K236R)                   | 5'-TGCCTGATAACCTGAGTATGGCTGACCCCAACATTCGCTTCCTGGATAAACTGCCCCAGCAGACCGGTGACCGTGC<br>TGGCATAAgaGAcCGaGTTTACAGCAACAGCATCTATGAGCTTCTGGAGAACGGGCAGCGGGTAAGTGTGCAGGGGAG<br>TGGGGGTCTCTGAGGAGGGGTCA-3' |                                 |
| PCR products amplified                     | 5'-TATCTCCTAGGGCTTCCGCTAGG-3'                                                                                                                                                                   | 5'-TGATCAGATGACACACCCAGAA-3'    |

**Supplementary Table 9.** List of antibodies used in this study.

| <b>Antibodies used for Western blotting (WB) and immunoprecipitation (IP).</b> |                           |            |             |              |                  |       |                              |
|--------------------------------------------------------------------------------|---------------------------|------------|-------------|--------------|------------------|-------|------------------------------|
| Primary antibodies                                                             | Supplier                  | Catalogue  | Application | Host species | Species activity | clone | Dilution                     |
| anti-cGAS                                                                      | Cell Signaling Technology | 79978      | WB          | Rabbit       | Hu               | N. A  | 1:2000                       |
| anti-STING                                                                     | Cell Signaling Technology | 13647      | WB, IP      | Rabbit       | Hu, Mo           | N. A  | 1:2000 for WB,<br>5µg for IP |
| anti-pSTING                                                                    | Cell Signaling Technology | 50907      | WB          | Rabbit       | Hu               | N. A  | 1:2000                       |
| anti-pSTING                                                                    | Cell Signaling Technology | 72971      | WB          | Rabbit       | Mo               | N. A  | 1:2000                       |
| anti-TBK1                                                                      | Cell Signaling Technology | 38066      | WB          | Rabbit       | Hu               | N. A  | 1:2000                       |
| anti-pTBK1                                                                     | Cell Signaling Technology | 5483       | WB          | Rabbit       | Hu               | N. A  | 1:2000                       |
| anti-IRF3                                                                      | Cell Signaling Technology | 4302       | WB          | Rabbit       | Hu               | N. A  | 1:2000                       |
| anti-pIRF3                                                                     | Cell Signaling Technology | 29047      | WB          | Rabbit       | Hu               | N. A  | 1:2000                       |
| anti-STAT1                                                                     | Cell Signaling Technology | 14994      | WB          | Rabbit       | Hu               | N. A  | 1:2000                       |
| anti-pSTAT1                                                                    | Cell Signaling Technology | 9167       | WB          | Rabbit       | Hu               | N. A  | 1:2000                       |
| anti-γH2AX                                                                     | Cell Signaling Technology | 9718       | WB          | Rabbit       | Hu               | N. A  | 1:2000                       |
| anti-IDO1                                                                      | Cell Signaling Technology | 68572      | WB          | Rabbit       | Mo               | N. A  | 1:2000                       |
| anti-IDO1                                                                      | Cell Signaling Technology | 86630      | WB          | Rabbit       | Hu               | N. A  | 1:2000                       |
| anti-AhR                                                                       | Cell Signaling Technology | 83200      | WB          | Rabbit       | Hu               | N. A  | 1:2000                       |
| anti-AhR                                                                       | R&D systems               | AF6697     | WB          | Sheep        | Mo               | N. A  | 1:2000                       |
| anti-FLAG                                                                      | Cell Signaling Technology | 14793      | WB          | Rabbit       | Hu               | N. A  | 1:2000                       |
| anti-FLAG                                                                      | Cell Signaling Technology | 8146       | WB          | Mouse        | Hu               | N. A  | 1:2000                       |
| anti-CUL4B                                                                     | Proteintech               | 12916-1-AP | WB          | Rabbit       | Hu, Mo           | N. A  | 1:2000                       |
| anti-RBX1                                                                      | Cell Signaling Technology | 11922      | WB          | Rabbit       | Hu               | N. A  | 1:2000                       |
| anti-SLC7A5                                                                    | Proteintech               | 28670-1-AP | WB          | Rabbit       | Hu               | N. A  | 1:2000                       |
| anti-SCL7A5                                                                    | ThermoFisher              | PA5-115916 | WB          | Rabbit       | Hu, Mo           | N. A  | 1:2000                       |

|                                                            |                           |            |        |        |        |      |                              |
|------------------------------------------------------------|---------------------------|------------|--------|--------|--------|------|------------------------------|
| anti-GAPDH                                                 | Cell Signaling Technology | 5174       | WB     | Rabbit | Hu, Mo | N. A | 1:5000                       |
| anti-IFNAR1                                                | ThermoFisher              | MA5-32006  | WB     | Rabbit | Hu, Mo | N. A | 1:2000                       |
| anti-UB                                                    | Cell Signaling Technology | 43124      | WB     | Rabbit | Hu     | N. A | 1:2000                       |
| anti-UB                                                    | Cell Signaling Technology | 3936       | WB     | Mouse  | Hu     | N. A | 1:2000                       |
| anti-HA                                                    | Cell Signaling Technology | 5017       | WB     | Rabbit | Hu     | N. A | 1:2000                       |
| anti-HA                                                    | Cell Signaling Technology | 2367       | WB     | Mouse  | Hu     | N. A | 1:2000                       |
| anti-MYC                                                   | Cell Signaling Technology | 2272       | WB, IP | Rabbit | Hu     | N. A | 1:2000 for WB,<br>5µg for IP |
| anti-MYC                                                   | Cell Signaling Technology | 2276       | WB, IP | Mouse  | Hu     | N. A | 1:2000 for WB,<br>5µg for IP |
| anti-UBK48                                                 | Cell Signaling Technology | 12805      | WB     | Rabbit | Hu     | N. A | 1:2000                       |
| anti-UBK63                                                 | Cell Signaling Technology | 12930      | WB     | Rabbit | Hu     | N. A | 1:2000                       |
| IgG control<br>Polyclonal antibody                         | Proteintech               | 30000-0-AP | IP     | Rabbit | Hu     | N. A | 5µg for IP                   |
| pierce anti-c-Myc<br>magnetic beads                        | ThermoFisher              | 88842      | IP     | Mouse  | Hu     | N. A | 20ul per test for<br>IP      |
| anti-MYC nanobody<br>magarose beads                        | AlpaliBio                 | KTSM1336   | IP     | Alpaca | Hu     | N. A | 25ul per test for<br>IP      |
| anti-mouse IgG,<br>HRP-linked Antibody                     | Cell Signaling Technology | 7076       | WB     | Horse  | Mo     | N. A | 1:5000                       |
| anti-rabbit IgG, HRP-<br>linked Antibody                   | Cell Signaling Technology | 7074       | WB     | Goat   | Rabbit | N. A | 1:5000                       |
| HRP-conjugated<br>Affinipure Rabbit<br>anti-Sheep IgG(H+L) | Proteintech               | SA00001-16 | WB     | Rabbit | Sheep  | N. A | 1:5000                       |
|                                                            |                           |            |        |        |        |      |                              |

| <b>Antibodies used for flow cytometric analysis.</b> |              |            |              |              |                  |          |                |
|------------------------------------------------------|--------------|------------|--------------|--------------|------------------|----------|----------------|
| Primary antibodies                                   | Supplier     | Catalogue  | Application  | Host species | Species activity | clone    | Dilution       |
| AF700 anti-human CD326                               | Biologend    | 324244     | Fc           | mouse        | Hu               | 9C4      | 5ug per test   |
| BV605 anti-human CD45                                | Biologend    | 368524     | Fc           | mouse        | Hu               | 2D1      | 5ug per test   |
| BV650 anti-mouse CD45                                | Biologend    | 103151     | Fc           | Rat          | Mo               | 30-F11   | 5ug per test   |
| PC7 anti-mouse CD3                                   | Biologend    | 100220     | Fc           | Rat          | Mo               | 17A2     | 5ug per test   |
| FITC anti-mouse CD8                                  | Biologend    | 100705     | Fc           | Rat          | Mo               | 53-6.7   | 5ug per test   |
| PE anti-mouse IFNG                                   | Biologend    | 505807     | Fc           | Rat          | Mo               | XMG1.2   | 5ug per test   |
| APC anti-mouse IL2                                   | Biologend    | 503809     | Fc           | Rat          | Mo               | JES6-5H4 | 5ug per test   |
| <b>Antibodies used for immunofluorescence (IF).</b>  |              |            |              |              |                  |          |                |
| Primary antibodies                                   | Supplier     | Catalogue  | Application  | Host species | Species activity | clone    | Dilution       |
| AhR                                                  | ThermoFisher | MA1-513    | IF           | Mouse        | Hu               | RPT9     | 1:100          |
| STING                                                | Proteintech  | 66680-1-Ig | IF           | Mouse        | Hu               | 1F1E1    | 1:100          |
| CUL4B                                                | Proteintech  | 12916-1-AP | IF           | Rabbit       | Hu               | N. A     | 1:100          |
| <b>Antibodies used for Neutralizing antibody.</b>    |              |            |              |              |                  |          |                |
| Primary antibodies                                   | Supplier     | Catalogue  | Application  | Host species | Species activity | clone    | Dilution       |
| anti-mouse IFNAR1                                    | Selleck      | A2121      | Neutralizing | N. A         | Mo               | MAR1-5A3 | 100µg per test |
| anti-mouse CD8α                                      | Bioxcell     | BE0061     | Neutralizing | N. A         | Mo               | 53-6.7   | 100µg per test |



## Supplementary References

1. Sjodahl G, *et al.* Different Responses to Neoadjuvant Chemotherapy in Urothelial Carcinoma Molecular Subtypes. *Eur Urol* **81**, 523-532 (2022).
2. Seiler R, *et al.* Impact of Molecular Subtypes in Muscle-invasive Bladder Cancer on Predicting Response and Survival after Neoadjuvant Chemotherapy. *Eur Urol* **72**, 544-554 (2017).
